# Supplementary material
Source: HighWire-hosted journal article supplement (http://www.ajevonline.org/highwire/filestream/10522/field_highwire_adjunct_files/0/SupplementalData.pdf)
Supplement: SupplementalData.pdf [file SupplementalData.pdf]

## Supplemental Data for:

Yuan F, Schreiner RP and Qian MC. 2018.

Soil nitrogen, phosphorus, and potassium alter  $\beta$ -damascenone and other volatiles in Pinot noir berries.

Am J Enol Vitic 69:157-166. doi: 10.5344/ajev.2017.17071.

**Supplemental Table 1** Sample scores and loading scores of principal component analysis for the first two components (PC1 and PC2, respectively).

|        | PC 1 (Samples) | PC 2 (Samples) |                                   | PC 1 (Variables) | PC 2 (Variables) |
|--------|----------------|----------------|-----------------------------------|------------------|------------------|
| Ctr_12 | 0.848          | -0.165         | Hexanal                           | 0.35             | -0.801           |
| 75N_12 | 0.988          | 0.192          | ( <i>E</i> )-2-hexenal            | 0.11             | -0.677           |
| 50N_12 | 0.824          | 0.467          | Hexanol                           | 0.511            | 0.070            |
| 30N_12 | 0.717          | 0.426          | ( <i>Z</i> )-2-hexenal            | 0.519            | -0.192           |
| 15N_12 | 1.000          | 1.000          | ( <i>E</i> )-2-hexenal            | 0.238            | -0.0054          |
| 50P_12 | 0.806          | -0.218         | ( <i>E</i> )-2-octenal            | 0.381            | -0.951           |
| 20P_12 | 0.819          | -0.112         | 1-Octen-3-ol                      | 0.278            | -0.252           |
| 0P_12  | 0.837          | -0.601         | Heptanol                          | 0.384            | -0.866           |
| 50K_12 | 0.825          | -0.411         | Free linalool                     | 0.475            | 0.120            |
| 20K_12 | 0.858          | -0.297         | Octanol                           | 0.557            | 0.067            |
| 0K_12  | 0.637          | -0.034         | Free $\alpha$ -terpineol          | 0.414            | 0.021            |
| Ctr_13 | 0.065          | -0.434         | Free $\beta$ -citronellol         | 0.437            | 0.094            |
| 75N_13 | -0.090         | -0.132         | Free $\beta$ -damascenone         | 0.465            | 0.675            |
| 50N_13 | -0.294         | -0.023         | Geraniol                          | 0.483            | 0.542            |
| 30N_13 | -0.181         | 0.257          | Hexanoic acid                     | 0.551            | -0.106           |
| 15N_13 | -0.446         | 0.818          | Free $\beta$ -ionone              | 0.466            | -0.553           |
| 50P_13 | -0.325         | -0.226         | Benzeneethanol                    | 0.496            | -0.251           |
| 20P_13 | -0.404         | -0.064         | Benzyl alcohol                    | 0.448            | 0.038            |
| 0P_13  | -0.633         | -0.049         | Total vitispirane                 | 0.212            | 0.796            |
| 50K_13 | -0.585         | -0.199         | Total $\beta$ -damascenone        | -0.106           | -1.00            |
| 20K_13 | -0.547         | 0.247          | Total TDN                         | -0.108           | 0.274            |
| 0K_13  | -0.593         | 0.035          | Total $\beta$ -ionone             | 0.415            | -0.597           |
| Ctr_14 | -0.353         | -0.301         | Bound ( <i>Z</i> )-linalool oxide | 0.522            | 0.284            |
| 75N_14 | -0.066         | -0.078         | Bound ( <i>E</i> )-linalool oxide | 0.547            | 0.095            |
| 50N_14 | -0.287         | 0.066          | Bound linalool                    | 0.529            | 0.378            |
| 30N_14 | -0.618         | 0.602          | Bound $\alpha$ -terpineol         | -0.012           | 0.994            |
| 15N_14 | -0.677         | 0.647          | Bound $\beta$ -citronellol        | -0.478           | -0.286           |
| 50P_14 | -0.641         | -0.079         | Bound geraniol                    | 0.461            | 0.635            |
| 20P_14 | -0.525         | -0.407         |                                   |                  |                  |
| 0P_14  | -0.393         | -0.325         |                                   |                  |                  |
| 50K_14 | -0.445         | -0.175         |                                   |                  |                  |
| 20K_14 | -0.633         | -0.107         |                                   |                  |                  |
| 0K_14  | -0.490         | -0.319         |                                   |                  |                  |
